# Supplementary material for: Reflecting on Graphs: Attributes of Graph Choice and Construction Practices in Biology
Source: Atypon-hosted journal article supplement (doi:10.1187/cbe.16-08-0245), 2017-08-19

# Supplemental Material

*CBE—Life Sciences Education*

Angra *et al.*

### Bacterial growth scenario

Imagine you are a microbiologist. You are particularly intrigued by how temperature affects the growth of bacteria. In order to answer your question, you set up an experiment that measures the growth of a particular type of bacteria at two different temperatures. You collect your data and display it in a chart shown below:

| Time (min) | Number of Cells |        |        |        |        |        |
|------------|-----------------|--------|--------|--------|--------|--------|
|            | 22 °C           |        |        | 10°C   |        |        |
|            | Tube 1          | Tube 2 | Tube 3 | Tube 1 | Tube 2 | Tube 3 |
| 0          | 2               | 2      | 1      | 2      | 1      | 2      |
| 30         | 4               | 4      | 3      | 2      | 2      | 3      |
| 60         | 6               | 8      | 6      | 2      | 2      | 3      |
| 90         | 12              | 16     | 12     | 2      | 3      | 4      |
| 120        | 24              | 30     | 22     | 4      | 5      | 6      |

### Plant leaves scenario

Imagine you are a botanist. You are particularly intrigued by how the amount of water influences plant growth. In order to answer your question, you set up an experiment that measures the growth of a particular type of plant at two different water amounts. You collect your data and display it in a chart shown below:

| Time (Hours) | Number of Leaves   |         |         |                  |         |         |
|--------------|--------------------|---------|---------|------------------|---------|---------|
|              | 15 ml of water/day |         |         | 5ml of water/day |         |         |
|              | Plant 1            | Plant 2 | Plant 3 | Plant 1          | Plant 2 | Plant 3 |
| 0            | 0                  | 1       | 0       | 0                | 0       | 0       |
| 30           | 2                  | 1       | 3       | 0                | 1       | 1       |
| 60           | 3                  | 3       | 5       | 2                | 1       | 2       |
| 90           | 4                  | 3       | 5       | 2                | 1       | 3       |
| 120          | 6                  | 5       | 7       | 3                | 1       | 4       |

| <b>Participant Code</b> | <b>Scenario</b> | <b>Year in College</b> | <b>Major Track</b>           | <b>Past Research Experience?</b>                                                            |
|-------------------------|-----------------|------------------------|------------------------------|---------------------------------------------------------------------------------------------|
| UGNR 1                  | Bacteria        | 2nd                    | General                      | No                                                                                          |
| UGNR 2                  | Plant           | 2nd                    | Cell, molecular, development | No                                                                                          |
| UGNR 3                  | Plant           | 1st                    | Genetics                     | No                                                                                          |
| UGNR 4                  | Bacteria        | 1st                    | Genetics                     | No                                                                                          |
| UGNR 5                  | Plant           | 1st                    | Biochemistry                 | No                                                                                          |
| UGNR 6                  | Plant           | 1st                    | General                      | No                                                                                          |
| UGNR 7                  | Bacteria        | 3rd                    | Neurobiology, physiology     | No                                                                                          |
| UGNR 8                  | Bacteria        | 1st                    | General                      | No                                                                                          |
| UGNR 9                  | Bacteria        | 2nd                    | General                      | No                                                                                          |
| UGNR 10                 | Plant           | 3rd                    | Biochemistry                 | No                                                                                          |
| UGR 1                   | Plant           | 4th                    | Cell, molecular, development | Yes, 4 semesters of research, visual images, cell counts, growth rates                      |
| UGR 2                   | Bacteria        | 4th                    | Genetics                     | Yes, results of gels and drosophila crosses                                                 |
| UGR 3                   | Bacteria        | 4th                    | General                      | Yes, cell count and analysis                                                                |
| UGR 4                   | Plant           | 1st                    | Neurobiology, physiology     | Yes, unpaid internship, neuron feedback from cockroaches                                    |
| UGR 5                   | Plant           | 4th                    | Neurobiology, physiology     | Yes, two years of research, population measurements of cellular growth and intensity values |

| <b>Participant Code</b> | <b>Scenario</b> | <b>Doctoral Research Emphasis</b>         | <b>Year in Graduate School</b> | <b>Undergraduate Research Experience?</b>                                                                                                        |
|-------------------------|-----------------|-------------------------------------------|--------------------------------|--------------------------------------------------------------------------------------------------------------------------------------------------|
| GS 1                    | Bacteria        | Microbiology                              | 3rd                            | UG, screened to identify virulence factors of <i>Mycobacterium marinum</i>                                                                       |
| GS 2                    | Plant           | Cancer Biology and Immunology             | 4th                            | UG, population surveys of freshwater mussels                                                                                                     |
| GS 3                    | Plant           | Plant and Soil Ecology                    | 2nd                            | UG, characterized magnetotactic bacteria                                                                                                         |
| GS 4                    | Bacteria        | Avian Behavior                            | 2nd                            | UG, education research, studied task switching                                                                                                   |
| GS 5                    | Bacteria        | Structural Biology                        | 4th                            | UG, compared phenotypes of wild type and mutant bacteria                                                                                         |
| GS 6                    | Bacteria        | Virology and Gene Therapy                 | 4th                            | UG, clinical trials                                                                                                                              |
| GS 7                    | Bacteria        | Infectious Diseases                       | 5th                            | UG, expression, purification and crystallization of a recombinant protein that is involved in the degradation of a specific class of xenobiotics |
| GS 8                    | Plant           | Retinal Degeneration and Drug Development | 2nd                            | UG, sequenced data from human patients                                                                                                           |

| <b>Participant Code</b> | <b>Scenario</b> | <b>Field of Research</b>        | <b>Teach Graphing in the Classroom?</b>                                                                                                                                                                  |
|-------------------------|-----------------|---------------------------------|----------------------------------------------------------------------------------------------------------------------------------------------------------------------------------------------------------|
| P 1                     | Bacteria        | Behavioral neuroscience         | All aspects of experimental design and statistical analysis to assist with making relevant choices of numbers of subjects, control groups and inferential statistics appropriate for hypothesis testing. |
| P 2                     | Bacteria        | Behavioral ecology              | Elements of experimental design.                                                                                                                                                                         |
| P 3                     | Bacteria        | Microbial genetics & physiology | Enzyme assays with standard deviations and measures of significance.                                                                                                                                     |
| P 4                     | Plant           | Cellular neurobiology           | Discuss experimental data form classic experiments in graphic form for enzyme kinetics and membrane potential chapters. Graphs are used to solve problems.                                               |
| P 5                     | Plant           | Neurobiology                    | Discuss graphs and experimental techniques used in neurobiology.                                                                                                                                         |

Graphs constructed from the bacteria scenario for undergraduates with no research experience (UGNR)

UGNR4\_1<sup>st</sup> year

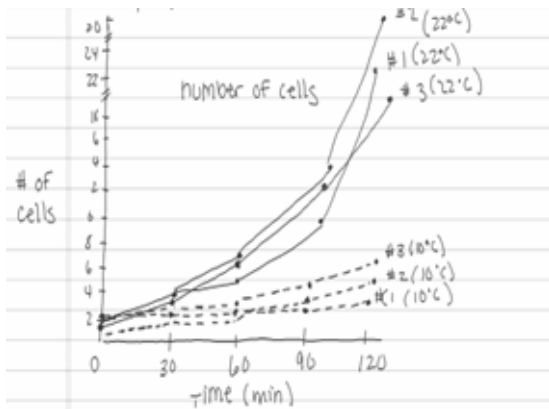

UGNR1\_2<sup>nd</sup> year

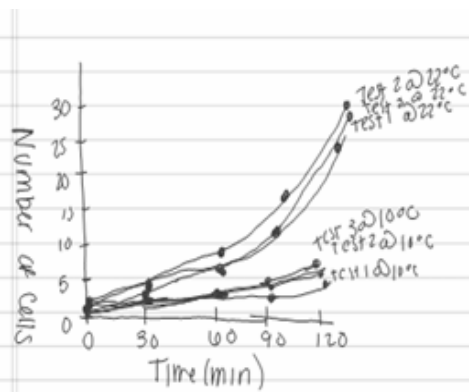

UGNR9\_2<sup>nd</sup> year

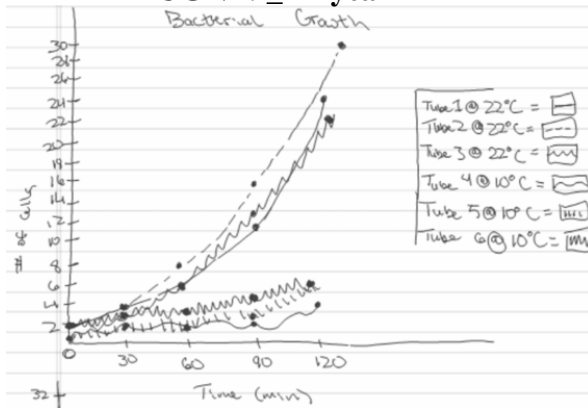

UGNR8\_1<sup>st</sup> year

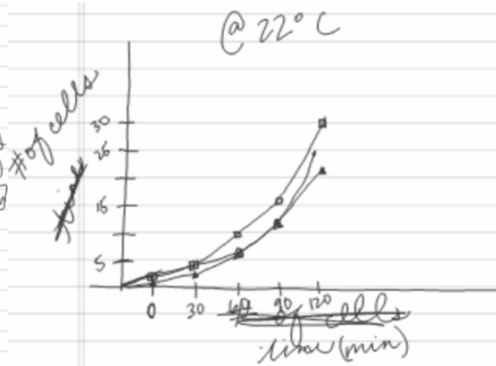

UGNR7\_3<sup>rd</sup> year

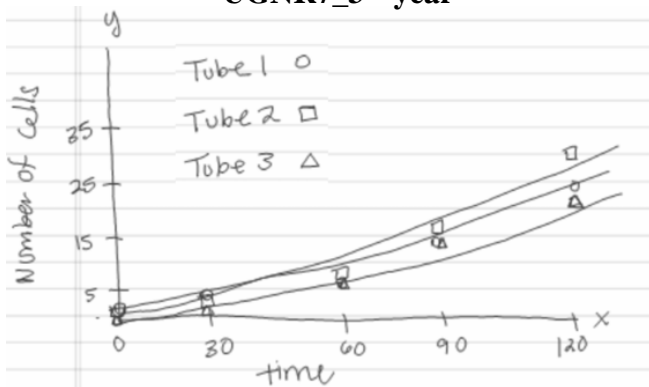

Graphs constructed from the plant scenario for undergraduates with no research experience (UGNR)

UGNR3\_1<sup>st</sup> year

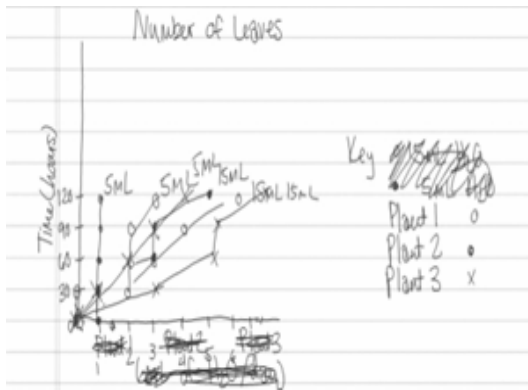

UGNR2\_2<sup>nd</sup> year

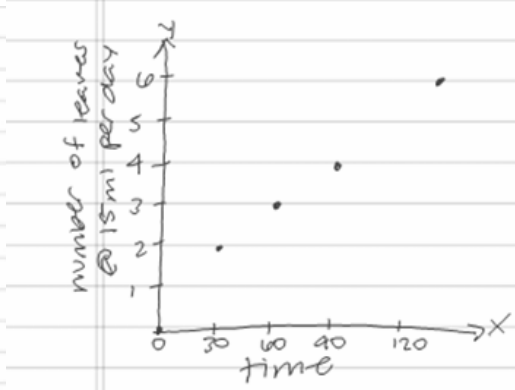

UGNR10\_3<sup>rd</sup> year

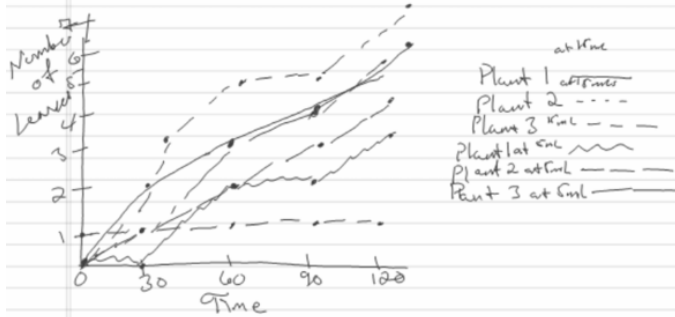

UGNR6\_1<sup>st</sup> year

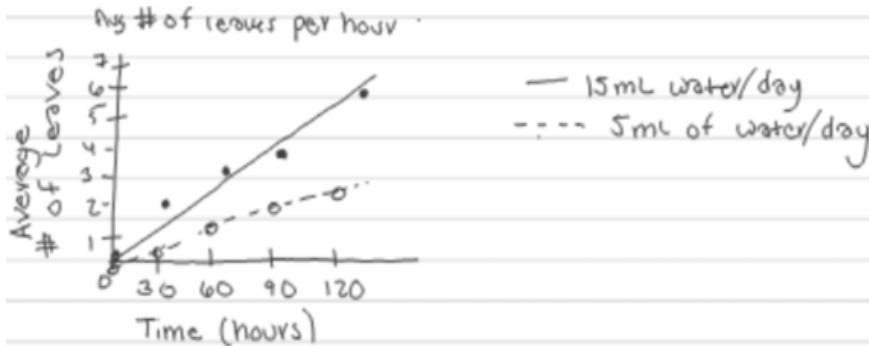

UGNR5\_1<sup>st</sup> year

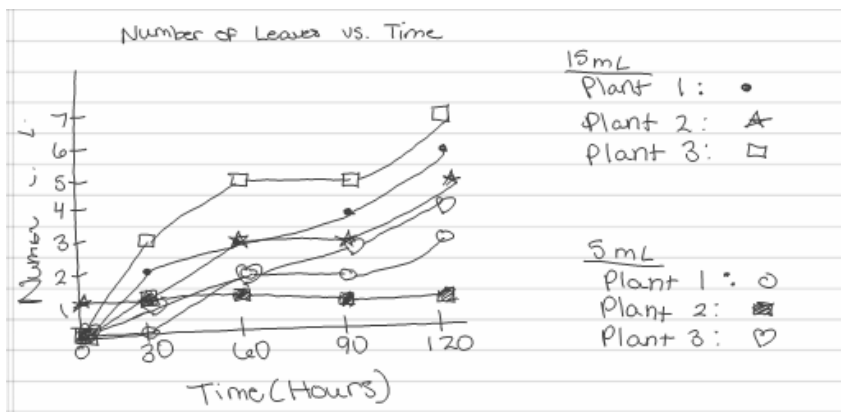

Graphs constructed from the bacteria scenario by undergraduates with research experience (UGR)

UGR2\_4<sup>th</sup> year

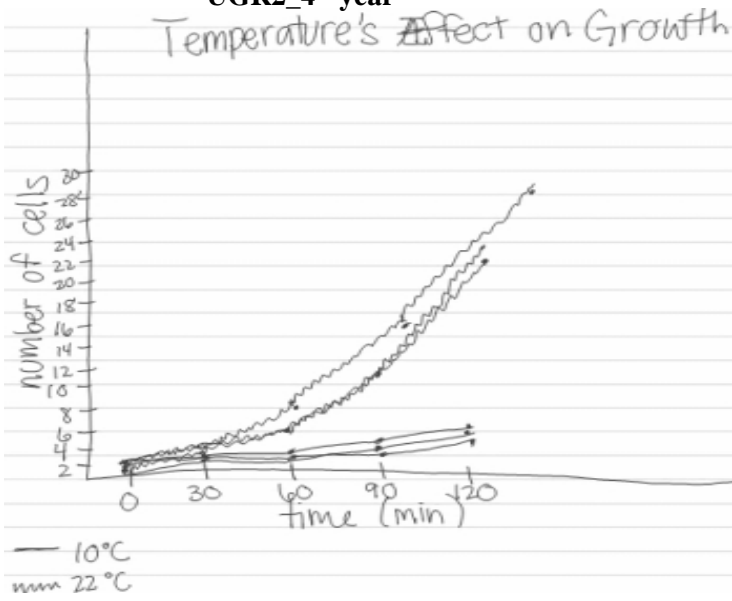

UGR3\_4<sup>th</sup> year

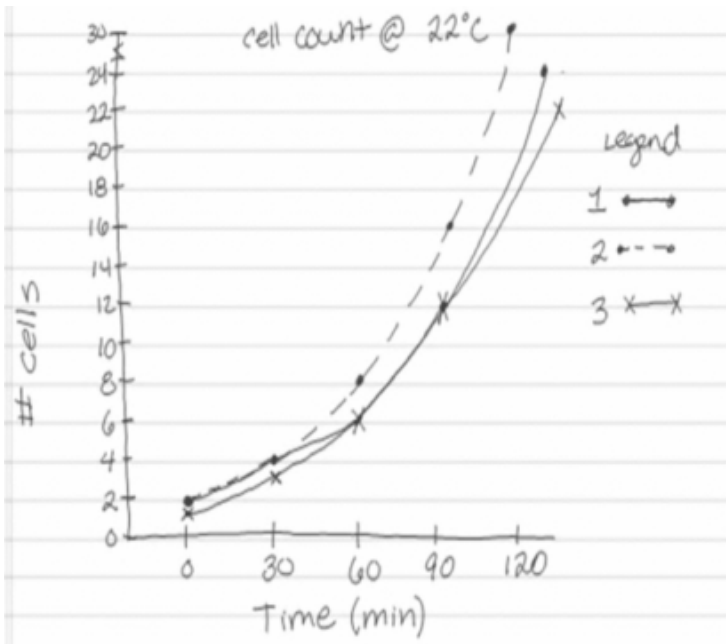



Graphs constructed from the plant scenario by undergraduates with research experience (UGR)

UGR1\_4<sup>th</sup> year

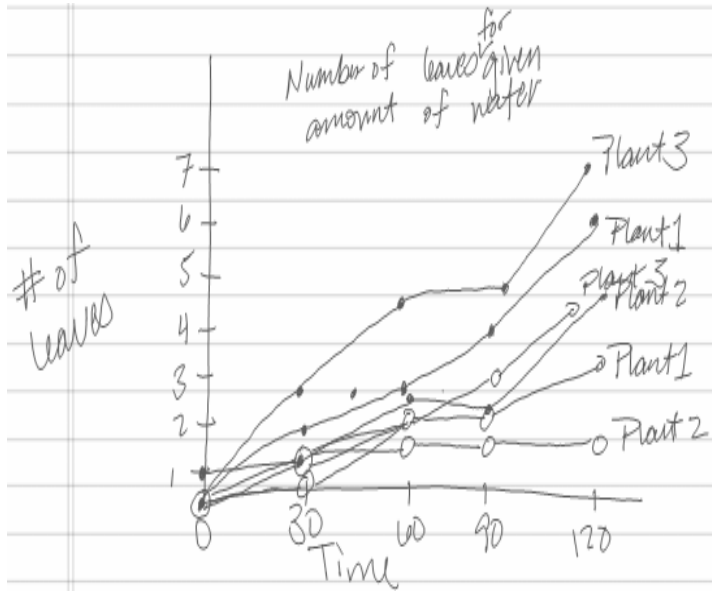

UGR4\_1<sup>st</sup> year

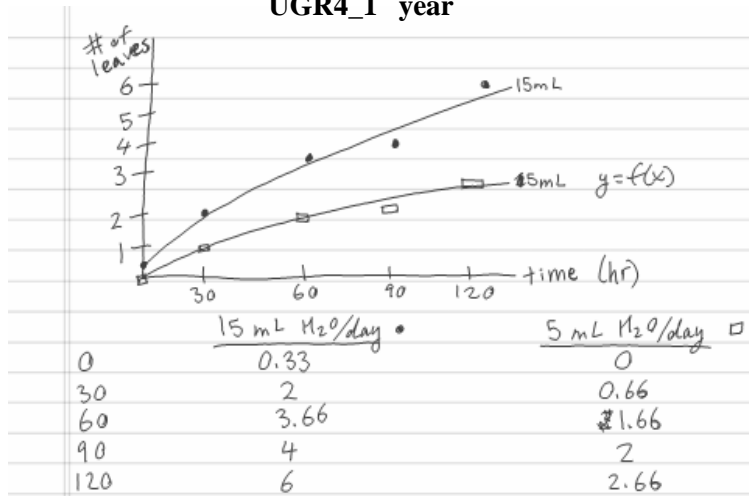

UGR5\_4<sup>th</sup> year

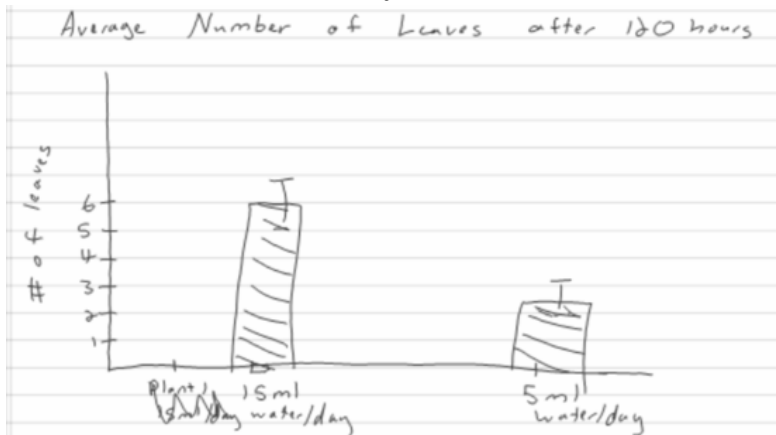

Graphs constructed from the bacteria scenario by graduate students (GS)

GS1\_3<sup>rd</sup> year

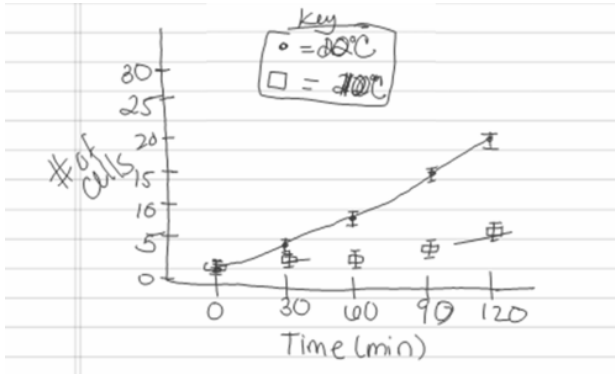

GS6\_4<sup>th</sup> year

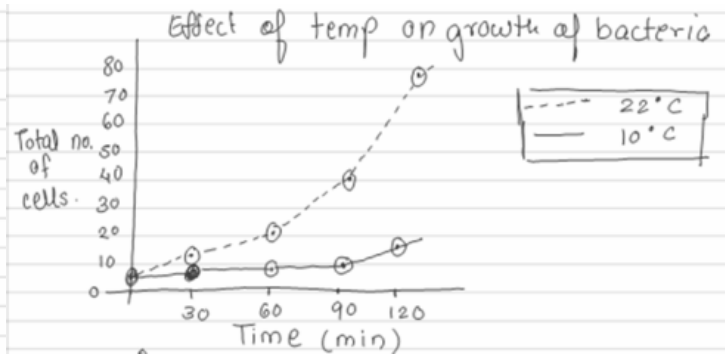

GS4\_2<sup>nd</sup> year

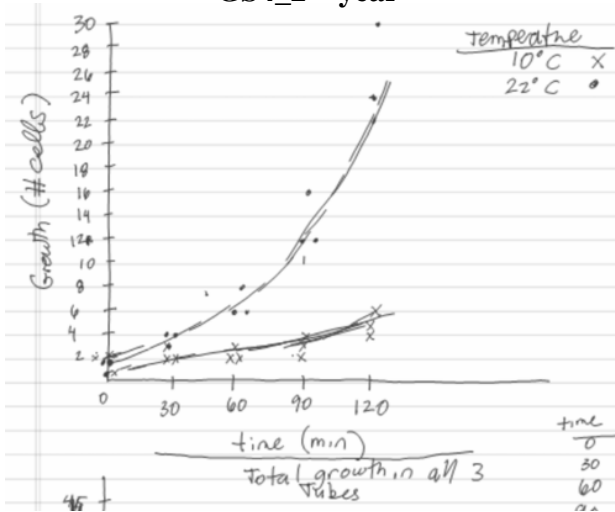

GS7\_5<sup>th</sup> year

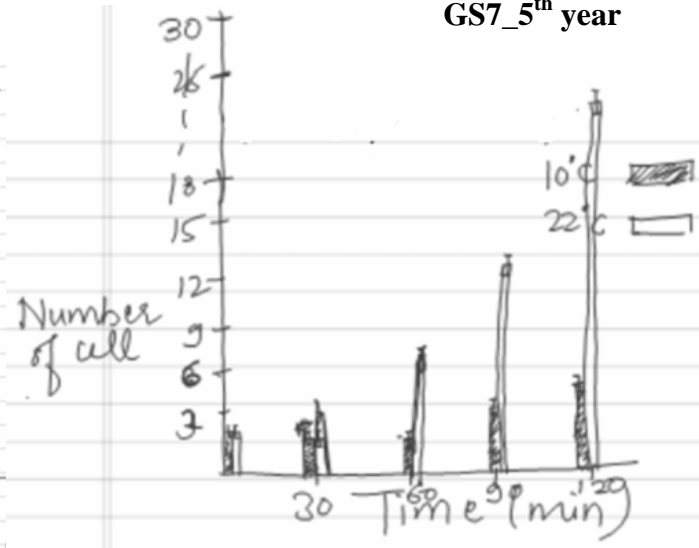

GS5\_4<sup>th</sup> year

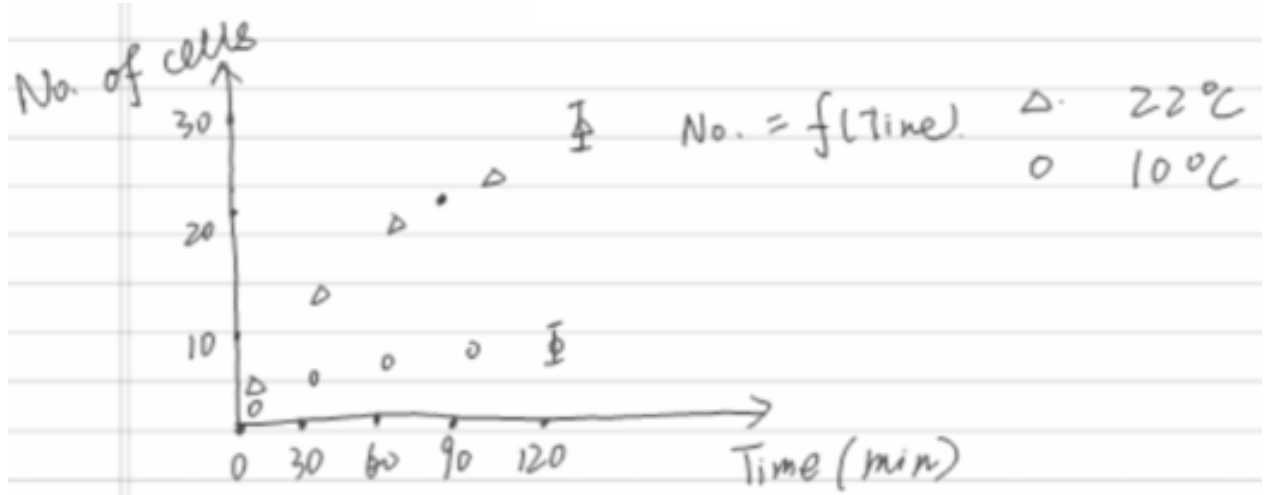

Graphs constructed from the plant scenario by graduate students (GS)

GS2\_4<sup>th</sup> year

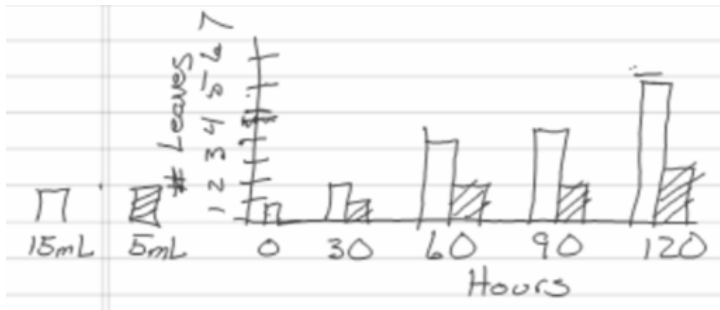

GS3\_2<sup>nd</sup> year

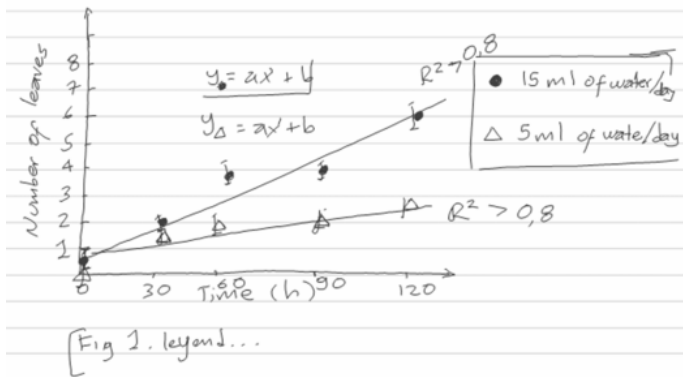

GS8\_2<sup>nd</sup> year

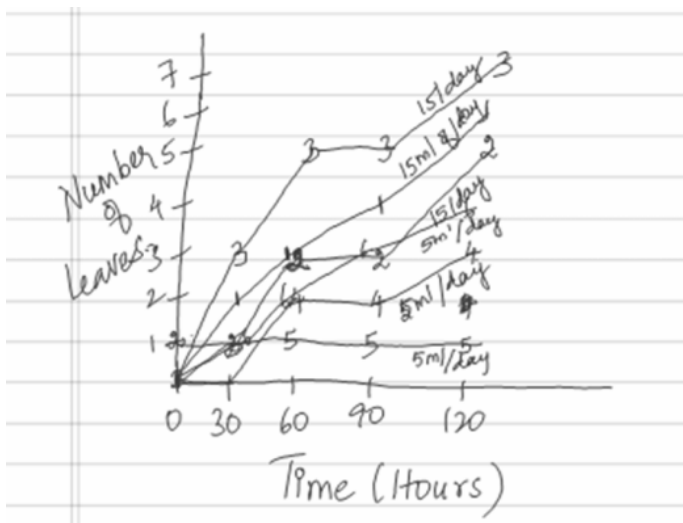

Graphs constructed from the bacteria scenario by professors (P)

PI Behavioral Neuroscience

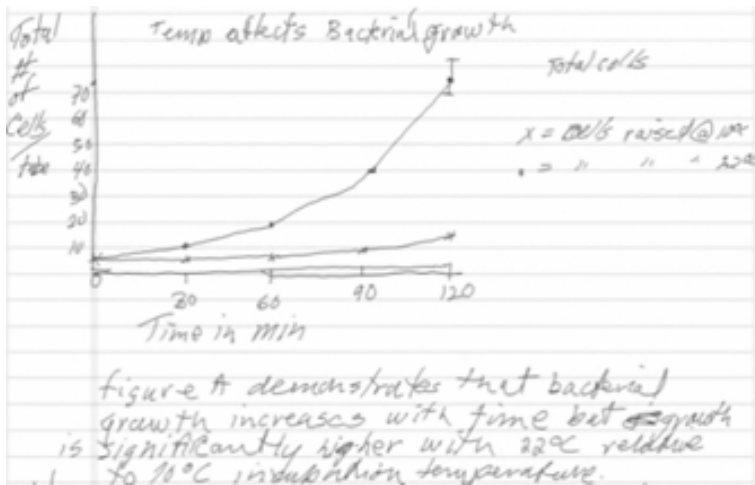

P2 Behavioral Ecology

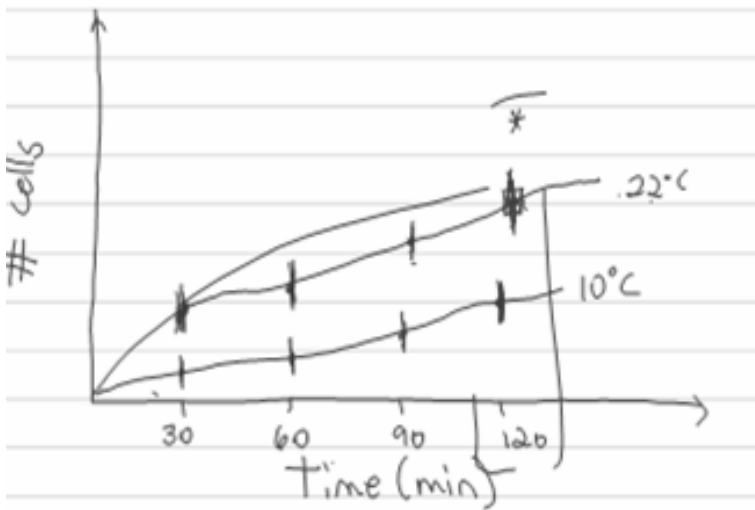

P3 Microbiology

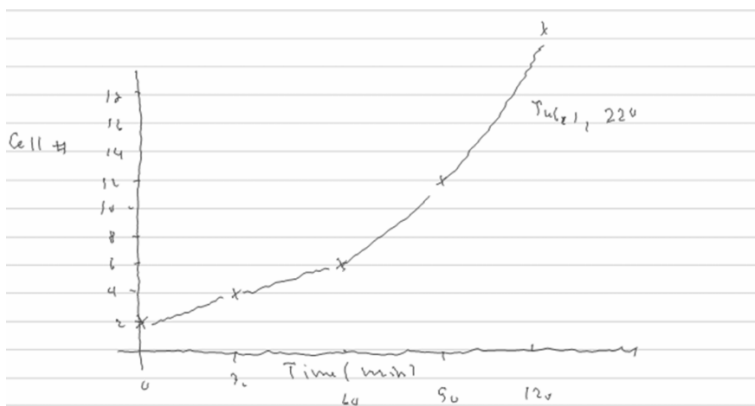

Graphs constructed from the plant scenario by professors (P)

P4\_Cellular neurobiology

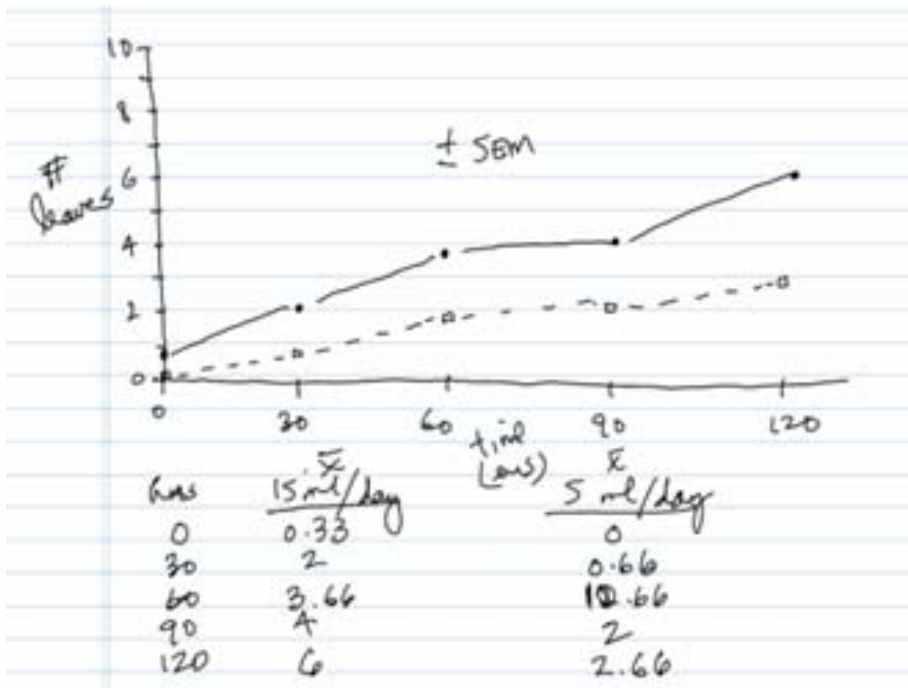

P5\_Neurobiology

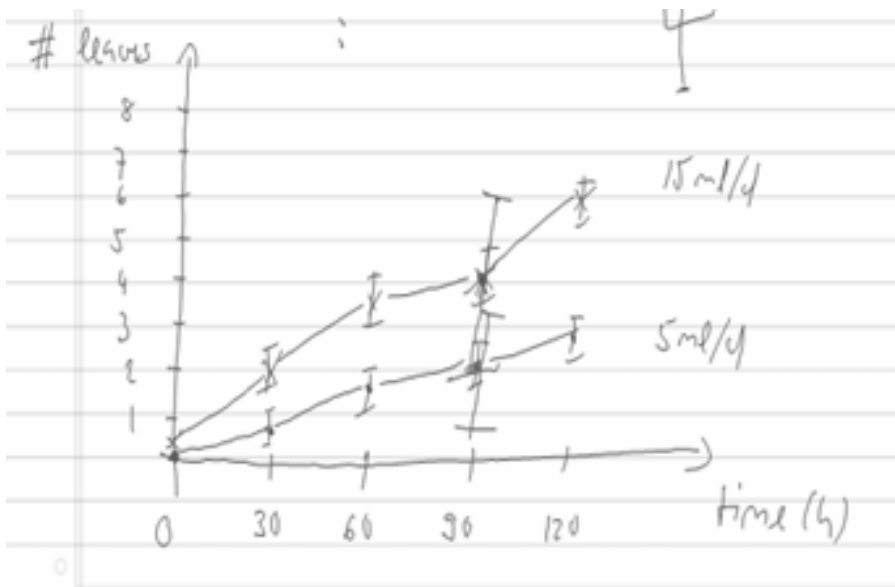

Supplement: combinedsupmats.pdf [file combinedsupmats.pdf]
